# Supplementary material for: Traditional, Indigenous Apple Varieties, a Fruit with Potential for Beneficial Effects: Their Quality Traits and Bioactive Polyphenol Contents
Source: PubMed Central journal article supplement (PMC7022233; doi:10.3390/foods9010052), 2020-01-05
Supplement: foods-09-00052-s001.pdf [file foods-09-00052-s001.pdf]

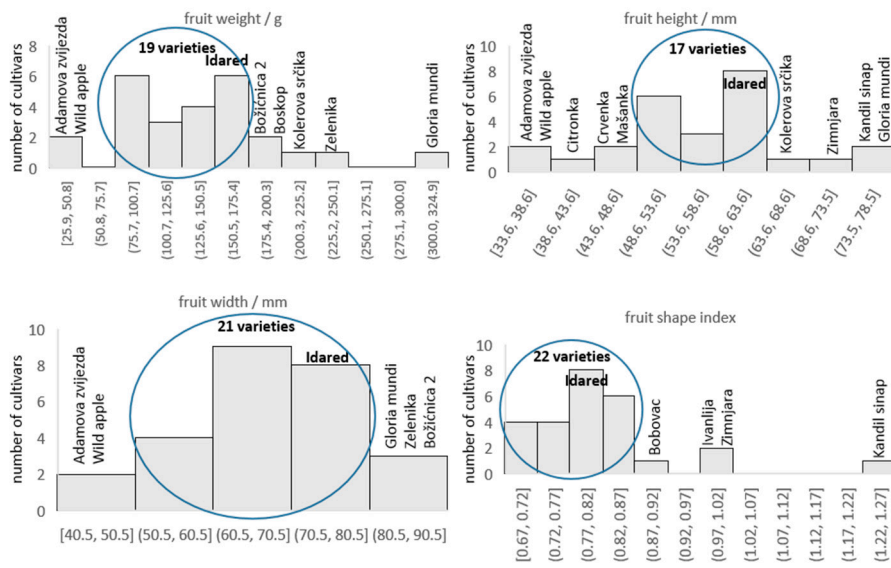

Figure S1. Histogram of basic external fruit quality characteristics with marked commercial apple variety (Idared)

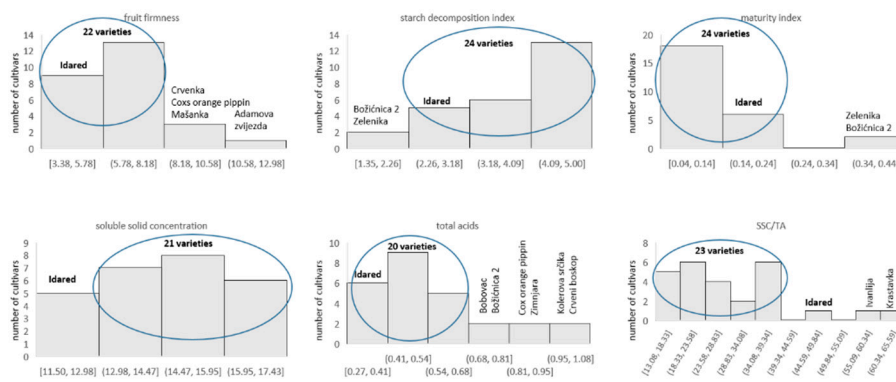

Figure S2. Histogram of basic internal fruit quality characteristics with marked commercial apple variety (Idared).

Table S1. Pearson correlation coefficient for internal and external fruit characteristics and seed characteristics

|          |                                 | Fruit characteristics |              |             |                | Fruit quality                      |              |                |       |              |        |       | Seeds       |                   | weight       |            |             |
|----------|---------------------------------|-----------------------|--------------|-------------|----------------|------------------------------------|--------------|----------------|-------|--------------|--------|-------|-------------|-------------------|--------------|------------|-------------|
|          |                                 | weight<br>g           | height<br>mm | width<br>mm | shape<br>index | firmness<br>(kg cm <sup>-2</sup> ) | SDI          | SSC<br>(°Brix) | MI    | TA<br>(%)    | SSC/TA | pH    | total       | Number<br>healthy | bad          | total<br>g | 1 seed<br>g |
| external | weight (g)                      | 1.00                  |              |             |                |                                    |              |                |       |              |        |       |             |                   |              |            |             |
|          | height (mm)                     | <b>0.77</b>           | 1.00         |             |                |                                    |              |                |       |              |        |       |             |                   |              |            |             |
|          | width (mm)                      | <b>0.94</b>           | <b>0.72</b>  | 1.00        |                |                                    |              |                |       |              |        |       |             |                   |              |            |             |
|          | shape index                     | 0.05                  | <b>0.63</b>  | -0.08       | 1.00           |                                    |              |                |       |              |        |       |             |                   |              |            |             |
|          | firmness (kg cm <sup>-2</sup> ) | -0.09                 | -0.27        | -0.11       | -0.30          | 1.00                               |              |                |       |              |        |       |             |                   |              |            |             |
| internal | SDI                             | -0.55                 | -0.35        | -0.54       | 0.07           | -0.19                              | 1.00         |                |       |              |        |       |             |                   |              |            |             |
|          | SSC (°Brix)                     | 0.04                  | 0.14         | 0.00        | 0.21           | -0.13                              | -0.07        | 1.00           |       |              |        |       |             |                   |              |            |             |
|          | MI                              | 0.39                  | 0.08         | 0.40        | -0.32          | 0.51                               | <b>-0.82</b> | -0.24          | 1.00  |              |        |       |             |                   |              |            |             |
|          | TA (%)                          | 0.14                  | 0.11         | 0.22        | -0.10          | 0.17                               | -0.16        | 0.06           | 0.18  | 1.00         |        |       |             |                   |              |            |             |
|          | SSC/TA                          | -0.03                 | 0.09         | -0.07       | 0.20           | -0.23                              | 0.08         | 0.31           | -0.24 | <b>-0.77</b> | 1.00   |       |             |                   |              |            |             |
|          | pH                              | 0.04                  | 0.07         | 0.03        | 0.06           | -0.39                              | 0.03         | 0.02           | -0.17 | -0.25        | 0.33   | 1.00  |             |                   |              |            |             |
|          | total number                    | -0.22                 | -0.35        | -0.27       | -0.22          | 0.14                               | 0.06         | -0.17          | -0.08 | -0.18        | 0.09   | -0.22 | 1.00        |                   |              |            |             |
|          | number of healthy               | -0.46                 | -0.30        | -0.44       | 0.06           | 0.00                               | 0.27         | -0.38          | -0.21 | -0.30        | 0.07   | -0.03 | <b>0.66</b> | 1.00              |              |            |             |
| seeds    | number of bad                   | 0.45                  | 0.24         | 0.35        | -0.05          | 0.07                               | -0.26        | 0.34           | 0.17  | 0.21         | 0.00   | -0.15 | -0.16       | <b>-0.82</b>      | 1.00         |            |             |
|          | total weight(g)                 | -0.14                 | 0.03         | -0.12       | 0.18           | 0.10                               | -0.04        | -0.47          | 0.06  | -0.16        | 0.04   | -0.12 | 0.47        | <b>0.78</b>       | <b>-0.65</b> | 1.00       |             |
|          | 1 seed weight(g)                | 0.58                  | 0.50         | 0.55        | 0.10           | 0.21                               | -0.51        | -0.13          | 0.52  | 0.33         | -0.19  | -0.10 | -0.30       | -0.35             | 0.27         | 0.27       | 1.00        |

SDI – starch decomposition index; SSC – soluble solid concentration, MI – maturity index; TA – total acids (% of malic acid)
